# Supplementary material for: How is the Lives Saved Tool (LiST) used in the global health community? Results of a mixed-methods LiST user study
Source: BMC Public Health. 2017 Nov 7;17(Suppl 4):773. doi: 10.1186/s12889-017-4750-5 (PMC5688436; doi:10.1186/s12889-017-4750-5)
Supplement: Supplementary file 1 — LiST User Questionnaire. (PDF 139 kb) [file 12889_2017_4750_MOESM1_ESM.pdf]

# User Survey

\* Required

Name \*

Job Title

Email address \*

Organization

## General Information

1. How often do you use LiST for analysis? \*

- ☐ Weekly
- ☐ Monthly
- ☐ Quarterly
- ☐ Annually
- ☐ Less than once a year
- ☐ I have never used LiST for analysis

2. When was the last time you used LiST for analysis? \*

- ☐ In the past month
- ☐ In the past 3 months
- ☐ In the past 6 months
- ☐ In the past year
- ☐ More than one year ago

3. How many others in your organization use (or know how to use) LiST? \*

- ☐ None
- ☐ 1-5
- ☐ 5-10
- ☐ 10-20

- ☐ More than 20

**4. Where do you get information about how to use LiST? \***

- ☐ Johns Hopkins website
- ☐ Lives Saved Tool website
- ☐ Avenir Health website
- ☐ LiST Help menu
- ☐ Communication with members of Baltimore LiST team
- ☐ Communication with Avenir staff
- ☐ I have not looked for information about how to use LiST
- ☐ Spectrum and One Health Tool Support Site
- ☐ Other:

**5. For which of the following purposes do you use LiST? \***

Select all that apply

- ☐ Program monitoring/evaluation
- ☐ Setting policy targets
- ☐ Planning
- ☐ Advocacy
- ☐ Research
- ☐ Modelling changes in mortality from coverage results
- ☐ Determining coverage increases necessary to achieve target mortality reductions
- ☐ As part of a OneHealth application
- ☐ None
- ☐ Other:

**6. For which of the following applications do you use LiST? \***

Select all that apply

- ☐ Maternal health
- ☐ Child health
- ☐ Nutrition
- ☐ Costing
- ☐ Subnational projections

- o ☐ None
- o ☐ Other:

## Spectrum Tools

### 7. How often do you use each of the following Spectrum modules? \*

|           | Often                 | Occasionally          | Never                 |
|-----------|-----------------------|-----------------------|-----------------------|
| DemProj   | <input type="radio"/> | <input type="radio"/> | <input type="radio"/> |
| AIM       | <input type="radio"/> | <input type="radio"/> | <input type="radio"/> |
| FamPlan   | <input type="radio"/> | <input type="radio"/> | <input type="radio"/> |
| OneHealth | <input type="radio"/> | <input type="radio"/> | <input type="radio"/> |
| LiST      | <input type="radio"/> | <input type="radio"/> | <input type="radio"/> |

### 8. Do you currently use the Missed Opportunities feature of LiST? \*

Note: Missed Opportunities is a feature of the software that projects the impact of each intervention scaled up individually to 90% to quickly assess the most impactful interventions in a given country setting.

- o ☐ Yes
- o ☐ No
- o ☐ No, but now that I know what it does, I'd be interested

### 9. Do you currently use the Easy LiST feature of LiST? \*

Note: Easy List is a feature of the software that lets you calculate results with fewer input parameters.

- o ☐ Yes
- o ☐ No
- o ☐ No, but now that I know what it does, I'd be interested

### 10. Which of the following results do you use in LiST? \*

Select all that apply

- o ☐ Total deaths
- o ☐ Deaths prevented relative to impact year
- o ☐ Cause specific deaths
- o ☐ Deaths prevented by cause
- o ☐ Deaths prevented by intervention
- o ☐ Deaths prevented by intervention by cause

- ☐ Mortality rates
- ☐ Prevalence of stunting
- ☐ Prevalence of wasting
- ☐ Breastfeeding prevalence
- ☐ Incidence and etiology
- ☐ Costs
- ☐ None
- ☐ Other:

**11. Do you use the LiST generated tables and pie charts to communicate results? \***

- ☒ Yes
- ☐ No. I export my results to Excel to create my own tables and charts
- ☐ No. I do not use tables and charts to communicate my results

## Software Development

**12. Which of the following would be useful to you in understanding or communicating your results?**

Select all that apply

- ☐ I would like to see more visually appealing graphics
- ☐ I would like to see more interactive tables and charts
- ☐ I would like to be able to export to Powerpoint for chart/table creation
- ☐ I do not need more help in understanding or communicating LiST results
- ☐ Other:

**13. Which of the following applications would you be interested in seeing added to LiST's current capabilities? \***

- ☐ Equity analysis
- ☐ Confidence intervals around number of lives saved
- ☐ Expanded costing features
- ☐ Analysis of impediments to scale up of coverage
- ☐ Expanded capacity to adjust structure or add interventions
- ☐ None
- ☐ Other:

**14. Currently, LiST is a computer-based software that you need to download (requires internet connection), and then run on your computer (does not require internet connection). Would you use a version of the software that had slightly reduced functionality if it could be used online? \***

For example, the online version might have fewer options for adjusting Demproj population and fertility parameters; fewer options for specifying HIV inputs and results; fewer options for customizing contraceptive method mix.

- ☐ Yes
- ☐ No
- ☐ Don't know

**15. Would you be interested in participating in an on-going online forum where LiST users could ask questions and share experiences about working with the software? \***

- ☐ Yes
- ☐ No

## User preferences

**16. Please select your preference for notifications about software updates \***

- ☐ Email
- ☐ Website
- ☐ Twitter or other social media
- ☐ I do not wish to be notified of software updates
- ☐ Other:

**17. Please select your preferences for LiST training workshops \***

Select all that apply

- ☐ In-person (Baltimore/DC) - 1 day overview workshop
- ☐ In person (Baltimore.DC) - 3 day advanced workshop
- ☐ Live webinar
- ☐ Website - how-to guides
- ☐ Website - slides from previous trainings
- ☐ Website - videos
- ☐ I'm not interested in LiST training workshops
- ☐ Other:

**18. We are forming a 'super-user' focus group which will meet periodically (remotely or in-person) to provide feedback to help developers make improvements in the software. Are you interested in participating? \***

Note: If you answer yes, we will contact you via email to follow up.

- ☐ Yes
- ☐ No

**19. Please use the space below to share any information you think would help our developers make the software better meet your specific needs.**

Submit

*Never submit passwords through Google Forms.*

Powered by
